# Supplementary material for: A Novel Approach to Characterize the Lipidome of Marine Archaeon Nitrosopumilus maritimus by Ion Mobility Mass Spectrometry
Source: Front Microbiol. 2021 Dec 2;12:735878. doi: 10.3389/fmicb.2021.735878 (PMC8674956; doi:10.3389/fmicb.2021.735878)
Supplement: Supplementary Table 1 — List of detected lipids and their CCS values. [file Table_2.XLSX]

## Sheet: Sheet1
	Positive						Negative
no	Retention time (min)	Compound ID	Lipid	adducts	CCS (Å2)		Retention time (min)	Lipid	adducts	adducts	CCS (Å2)
1	5.03598	LMPR01070308	Fucoxanthinol 3-myristoleate	M+Na	307.04
2							5.17417	LBGAHI1N01	β-hydroxyarchaetidyl-inositol	M-H2O-H	311.84
							5.17417	LBGAHI1N02	ɑ-hydroxyarchaetidyl-inositol	M-H2O-H	311.84
3							5.22955	LMFA01020327	Hydroxyphthioceranic acid (C42)	M+FA-H	275.71
4							5.4505	LMFA01080026	10-methoxy-octadecanoic acid	2M+FA-H	273.76
							5.4505	LMFA01080027	11-methoxy-octadecanoic acid	2M+FA-H	273.76
5	5.62583		phosphohexose-archaeol	M+Na, M+K, M+2Na-H, 2M+Na, 2M+H	321.32, 317.63, 319.41, 480.92, 479.75
6							5.70882	LMFA01020328	Hydroxyphthioceranic acid (C43)	M+FA-H	277.6
7	5.79167	LMPR04000014	bacteriohopane-32,33, 34-triol-35-carbamate	2M+K	400.31
8							7.09962	CHEBI:136687	2,3-bis-O-(geranylgeranyl)-sn-glycero-3-phosphoethanolamine	M-H2O-H	285.12
9							7.12723		PE-archaeol, short	M+K-2H	287.03
10	7.18233	LMPR01070307	Fucoxanthinol 3-myristate	M+H-H2O, M+K, M+Na, M+NH4, M+H-2H2O	297.75, 303.16, 301.35, 303.28, 292.01
11	8.04825	LBGAUG0N01	archaetidylglycerol phosphate (AGP), monounsaturated	M+Na	338.87
12	8.8037	LMFA01030503	18-nonadecynoic acid	2M+K	255.47
13	9.58677	LMFA07090153	Mayolene-20	M+K	264.31
14	9.7801	LMFA07010163	Linolenyl arachidate	M+CH3OH+H	271.12
15	9.946	LBGAAS0N01	archaetidyl-serine	M+Na	310.79
16							10.0012	LMPK12010210	Cyanidin 3-O-[2-O-(6-O-(trans-3-O-(beta-D-glucopyranosyl)caffeyl)-beta-D-glucopyranosyl)-6-O-(trans-4-O-(6-O-(trans-caffeyl)-beta-D-glucopyranposyl)caffeyl)-beta-D-glucopyranoside]-5-O-[beta-D-glucopyranoside]	M-H	437.45
17	10.3603	LMPR02010005	Coenzyme Q8	M+H, M+K, M+NH4, 2M+Na, M+H-H2O	278.34, 284.2, 286.36, 433.07, 276.4
18							10.9776	LMGP12010118	CL(1'-[16:0/18:2(9Z,12Z)],3'-[16:0/18:2(9Z,12Z)])	M-H, M+Na-2H, M-2H	401.67, 400.26, 425.36
19	11.1435	LMGP12010675	CL(1'-[18:2(9Z,12Z)/16:0],3'-[18:2(9Z,12Z)/18:1(9Z)])	M+NH4	419.47
20	11.1712	LMGP12011089	CL(1'-[20:4(5Z,8Z,11Z,14Z)/16:0],3'-[16:0/18:1(9Z)])	M+H, M+Na	418.13, 420.85
21							11.5949	LMGP12010115	CL(1'-[16:0/18:2(9Z,12Z)],3'-[16:0/16:0])	M-H, M+Na-2H, M-2H	399.03, 397.6, 420.31
22	11.6781	LMGP12010117	CL(1'-[16:0/18:2(9Z,12Z)],3'-[16:0/18:1(9Z)])	M+H, M+Na, M+NH4	412.59, 416.74, 418.15		11.733	LMGP12010117	CL(1'-[16:0/18:2(9Z,12Z)],3'-[16:0/18:1(9Z)])	M-H, M+Na-2H, M-2H	403.02, 400.25, 425.35
23							11.8711	LMGP12010514	CL(1'-[18:1(9Z)/18:1(9Z)],3'-[16:0/18:2(9Z,12Z)])	M-H, M+Na-2H, M-2H	405.63, 405.58, 430.33
24	11.8714	LBGAYB0N01	cyclicarchaeol	M+NH4	286.95
25							12.092	LMGP12010139	CL(1'-[16:0/18:2(9Z,12Z)],3'-[20:0/16:0])	M+Na-2H	410.89
26	12.3133	LMPR02010004	Coenzyme Q9	2M+Na	457.65
27							12.4234		diglycosyl-hydroxyl-GDGT-0	M-H	442.25
28	12.544	LMGP12010006	CL(1'-[16:0/18:1(11Z)],3'-[16:0/18:1(11Z)])	M+H, M+Na, M+NH4	414, 420.91, 420.92		12.5437	LMGP12010006	CL(1'-[16:0/18:1(11Z)],3'-[16:0/18:1(11Z)])	M-H, M+Na-2H, M-2H	404.36
29	12.544	LMGP12010775	CL(1'-[18:2(9Z,12Z)/18:2(9Z,12Z)],3'-[18:1(9Z)/16:0])	M+2Na-H	420.79
30	12.6545	LMGP12010703	CL(1'-[18:2(9Z,12Z)/18:0],3'-[18:1(9Z)/16:0])	M+NH4, M+Na, M+H	423.61, 423.6, 419.51
31	12.765	LMGP12010525	CL(1'-[18:1(9Z)/18:1(9Z)],3'-[18:1(9Z)/18:1(9Z)])	M+H, M+NH4, M+Na, M+2Na-H	423.58, 429.01, 427.63, 428.94
32	12.7926	LMGP12010638	CL(1'-[18:1(9Z)/20:4(5Z,8Z,11Z,14Z)],3'-[18:2(9Z,12Z)/18:0])	M+2Na-H	426.15
33							12.9029	LBGAAN2S06	2-(6'-sulfo-β-D-mannosyl)-6-archaetidyl-ɑ-D-glucosylarchaeol	M-2H	579.23
34	12.9859	LBGACN1G01	glucopyranosyl-β-caldarchaeol-2 (fragment of G-OH-GDGT2-OH-G?)	M+NH4	422.13
35	13.2621	G-OH-GDGT2-OH-G	diglycosyl-dihydroxyl-GDGT-2 isomer	M+Na	445.86
36	13.4555	LMGL02050007	(no name)	M+2Na-H	400.06
37							13.6309	LMGP12010297	CL(1'-[18:0/18:1(9Z)],3'-[16:0/18:1(9Z)])	M-H, M+Na-2H, M-2H	409.62, 406.9, 430.32
38							13.7137	LMGP12010524	CL(1'-[18:1(9Z)/18:1(9Z)],3'-[18:1(9Z)/18:0])	M-2H, M+Na-2H, M-H	435.25, 410.82, 412.2
39	13.5757	LMGP12010447	CL(1'-[18:1(9Z)/16:0],3'-[18:0/18:1(9Z)])	M+Na	445.86
40	13.7138	LMGP12011137	CL(1'-[20:4(5Z,8Z,11Z,14Z)/18:0],3'-[18:1(9Z)/18:1(9Z)])	M+H, M+Na	427.63, 428.93		13.8519	LMGP12011237	CL(1'-[20:4(5Z,8Z,11Z,14Z)/20:0],3'-[18:0/16:0])	M-H, M+Na-2H, M-2H	416.06, 414.7, 435.17
41	14.6902	LMGP12010355	CL(1'-[18:0/18:2(9Z,12Z)],3'-[20:0/16:0])	M+NH4, M+Na, M+H	430.35, 431.69, 427.68
42	14.8283		GMGT-5 or GDGT-6 (fragment)	M+NH4	400
	14.8559		GMGT-5 or GDGT-6 (fragment)	M+Na	398.53
43	14.9388		Hex2-GDGT-2-IP	M+2Na, M+NH4, M+H	490.11, 470.94, 468.48
44	15.1321		phosphohexose-GDGT-3	M+2H, M+H	530.41, 428.84
45	15.1873		methoxy archaeol	2M+Na	440.12
46	15.3254	2G-2OG-GDGT2	diglycosyl-dihydroxyl-GDGT-2	M+Na	444.55
47							15.5188	ALPHA-GLC-6-P	&alpha;-D-glucose 6-phosphate	M-H2O-H	132.59
							15.5188	CPD-15711	&beta;-D-mannose 6-phosphate	M-H2O-H	132.59
							15.5188	GLC-6-P	&beta;-D-glucose 6-phosphate	M-H2O-H	132.59
							15.5188	MANNOSE-6P	&alpha;-D-mannose 6-phosphate	M-H2O-H	132.59
48							15.5562		monoglycosidic GDGT-0	M+FA-H	422.48
49	15.8323		GDGT-2 (fragment)	M+H-H2O, M+H	402.99, 404.37
	15.8323		phospho-dihexose-GDGT-2 (both rings on the same side)	M+H+Na, M+Na, M+NH4, M+H	558.78, 453.54, 450.97, 451.01
50							15.86		Hexose phosphohexose-GDGT-2	M-H	438.42
51	16.0533		hydroxyl-GDGT-6	M+NH4	398.5
52							16.1914	CPD-12461	tri-<i>trans</i>,hepta-<i>cis</i>-undecaprenyl diphosphate	2M+FA-H	452.63
							16.1914	UNDECAPRENYL-DIPHOSPHATE	<i>di-trans,octa-cis</i>-undecaprenyl diphosphate	2M+FA-H	452.63
53	16.1637		phospho-dihexose-Crenarchaeol	M+2Na, M+NH4, M+Na, M+H, M+2Na-H, M+H+Na	481.29, 443.15, 445.77, 444.5, 448.33, 550.69		16.219		monocosidic Crenarchaeol (fragment ion of phospho-dihexose-Crenarchaeol)	M+FA-H	412.09
54	16.9744		glycerol-diglycosyl-archaeol	M+H-2H2O	350.09
55							16.4676		diglycosyl-hydroxyl-GDGT-0	M-H, M+FA-H	439.79, 445.81
56							17.3888		diglycosyl-hydroxyl-GDGT-3	M-H, M+FA-H	433.59, 439.7
57	17.6197		diglycosidic GDGT-3	M+H+Na	490.68
58	17.6473		TH-GDGT-3	M+H+Na	503.76
59	18.2273		TH-GDGT-2	M+2Na	499.27
60	18.3377		diglycosyl-hydroxyl-GDGT-0	M+Na	447.19
	18.393		GDGT-0 (fragment)	M+Na	410
61							18.4204		phosphohexose-GDGT-0	M-H	424.96
62	18.6789		monoglycosidic GDGT-3	M+2H	543.24
63	18.7066		diglycosyl-hydroxyl-GDGT-2	M+H, M+NH4, M+Na, M+H-H2O, M+2Na, M+H+Na	443.32, 444.59, 440.63, 448.6, 476.78, 486.08		18.7339		diglycosyl-hydroxyl-GDGT-2	M-H, M+FA-H, M+Cl	432.33, 439.69, 434.75
64	18.8446	LMFA07010168	Behenyl linolenate	M+H-H2O	258.26
	18.8446	LMFA07010169	Linolenyl behenate	M+H-H2O	258.26
	18.8446	LMFA07010685	Gondoyl-linoleate	M+H-H2O	258.26
65	19.038		hydroxyl-GDD-2	M+Na	401.54
66	19.0656		diglycosyl-hydroxyl-GDGT-2	M+NH4	445.9
67							19.2312		phosphohexose-Crenarchaeol	M-H	414.64
68	19.2589		monoglycosyl-hydroxyl-GDGT-1	M+2Na, M+Na	521.93, 427.58
	19.3141		monoglycosyl-hydroxyl-GDGT-1	M+H	433.06
[63]							19.3693		diglycosyl-hydroxyl-GDGT-2	M-H	434.83
	19.3141		GDGT-3 (fragment)	M+NH4	408.62
69	19.7935		diglycosyl-hydroxyl-GDGT-3	M+NH4	444.6		19.8209		diglycosyl-hydroxyl-GDGT-3	M+FA-H	440.93
70	19.9869		monoglycosyl-hydroxyl-GDGT-0	M+H-H2O	429.04
	19.9869		monoglycosyl-hydroxyl-GDGT-0	M+H, M+Na, M+NH4, M+2Na, M+H+Na	430.35, 427.57, 431.66, 521.93, 522
	20.8252		monoglycosyl-hydroxyl-GDGT-0	M+2Na, M+Na	530.46, 434.34
71	20.2078		monoglycosyl-hydroxyl-GDGT-1	M+H-H2O	426.32
72	21.1013		monoglycosidic GDD-0	M+H-2H2O	419.69
73	21.4603		GDGT-2 (fragment)	M+NH4	412.86
	21.8844		GDGT-2 (fragment)	M+2H	500.8
	21.8844		diglycosidic GDGT-2	M+H	443.35		21.9122		diglycosidic GDGT-2	M+Cl	434.79
74	22.0777		diglycosidic GDGT-3	M+H+Na	495.21		22.1333		diglycosidic GDGT-3	M+Cl	433.54
	22.1053		GDGT-3 (fragment)	M+2H	496.31		22.1609		diglycosidic GDGT-3	M-H, M+FA-H	428.59, 437.26
75	22.271		diglycosidic GDGT-4	M+NH4, M+Na, M+H, M+H+Na	438.03, 436.68, 440.72, 499.7		22.299		diglycosidic GDGT-4	M+Cl	429.78
76	22.3815		hydroxyl-GDGT-0	M+NH4	418.41
77	22.492		GDD-4 (fragment)	M+Na	394.3
78							22.4647	LMPK12050173	Genistein 7-O-glucoside-6''-malonate	3M-H	421.08
							22.4647	LMPK12110372	Apigenin 5-(6''-malonylglucoside)	3M-H	421.08
							22.4647	LMPK12110373	Apigenin 7-(6''-malonylglucoside)	3M-H	421.08
							22.4647	LMPK12110378	Apigenin 7-(2''-glucuronosyllactate)	3M-H	421.08
							22.4647	LMPK12111089	5,6,7-Trihydroxyflavone 7-(6''-malonylglucoside)	3M-H	421.08
							22.4647	LMPK12113137	Herbacetin 8-(2'',3''-diacetylxyloside)	3M-H	421.08
79	22.861		GDGT-2 (fragment)	M+K	408.54
80	23.082		monoglycosidic GDD-1	M+H-2H2O	421.08
81	23.4688		monoglycosidic GDGT-0	M+H, M+NH4, M+H+Na	429.04, 431.7, 526.33
82							23.7825		monoglycosidic GDGT-1	M+Cl	418.64
83	24.169		monoglycosidic GDGT-3	M+H	422.21
	24.1966		GDGT-3 (fragment)	M+H, M+NH4	404.38
84	24.5282		monoglycosidic Crenarchaeol	M+2Na, M+H, M+Na, M+NH4, M+H+Na	513.35, 420.83, 415.21, 420.79, 513.42
85	24.7865		monoglycosidic GDD-0	M+H-2H2O	422.45
86	25.3112	LMPR01070262	Antheraxanthin	2M+K	373.32
87	25.4493		deoxy-glycosyl-GDGT-0	M+2Na, M+Na	526.31, 430.38
88	28.6648		GDGT-1	M+2Na, M+NH4	500.62, 411.44
89	28.8858		GDGT-2	M+H, M+NH4, M+Na	405.81, 407.18, 405.74
90	29.55		Crenarchaeol	M+H, M+NH4, M+Na, M+2Na	400.05, 402.89, 398.52, 487.05
